# Supplementary material
Source: PubMed Central journal article supplement (PMC1828926)
Supplement: eukcell_EC.00266-06_1.pdf [file eukcell_EC.00266-06_1.pdf]

1 **Legends to the Movies**

2 After running the movies in normal speed, one should go through them using the arrow keys  
3 and focus on e.g. one MT.

4

5 **Movie 01\_GFP AlpA**

6 GFP-AlpA comets move mostly towards the growing hyphal tip. The dynamics corresponds  
7 to the dynamics of the MT-plus end. Pictures were taken every 3-5 sec. and assembled to a  
8 movie.

9

10 **Movie 02\_GFP MTs\_wild type and 02a\_GFP MTs\_wild type**

11 Dynamics of GFP labeled MTs in wild type. Pictures were taken every 10 sec. and  
12 assembled to a movie.

13

14 **Movie 03\_GFP MTs\_delta alpA and 03a\_GFP MTs\_delta alpA**

15 Dynamics of GFP labeled MTs in an *alpA*-deletion strain. Pictures were taken every 10 sec.  
16 and assembled to a movie.

17

18 **Movie 04\_delta alpA\_normal mitosis**

19 Dynamics of GFP labeled MTs during mitosis in an *alpA*-deletion strain.

20

21 **Movie 05\_GFP KipA**

22 GFP-KipA comets in a wild type. Pictures were taken every 10 sec. and assembled to a  
23 movie.

24

25 **Movie 06\_GFP KipA\_delta AlpA**

26 GFP-KipA comets in an *alpA*-deletion strain. Pictures were taken every 10 sec. and  
27 assembled to a movie.
